# Supplementary material
Source: publisher figshare collection journal article supplement (https://acs.figshare.com/ndownloader/files/4036702)
Supplement: Supplementary file 1 [file 4036702]

# Supporting Information

## Electrospun Composite Nanofiber Yarns Containing Oriented Graphene Nanoribbons

Hidetoshi Matsumoto,<sup>†,\*</sup> Shinji Imaizumi,<sup>†</sup> Yuichi Konosu,<sup>†</sup> Minoru Ashizawa,<sup>†</sup> Mie Minagawa,<sup>†</sup>  
Akihiko Tanioka,<sup>†</sup> Wei Lu<sup>‡</sup>, and James M. Tour<sup>‡</sup>

<sup>†</sup>Department of Organic and Polymeric Materials, Tokyo Institute of Technology, 2-12-1 Ookayama,  
Meguro-ku, Tokyo 152-8552, Japan,

<sup>‡</sup>Departments of Chemistry and Mechanical Engineering and Materials Science and the Smalley Institute  
for Nanoscale Science and Technology, Rice University, MS222, 6100 Main Street, Houston, Texas  
77005, United States

\*Address correspondence to [matsumoto.h.ac@m.titech.ac.jp](mailto:matsumoto.h.ac@m.titech.ac.jp) and [tanioka.a.aa@m.titech.ac.jp](mailto:tanioka.a.aa@m.titech.ac.jp)

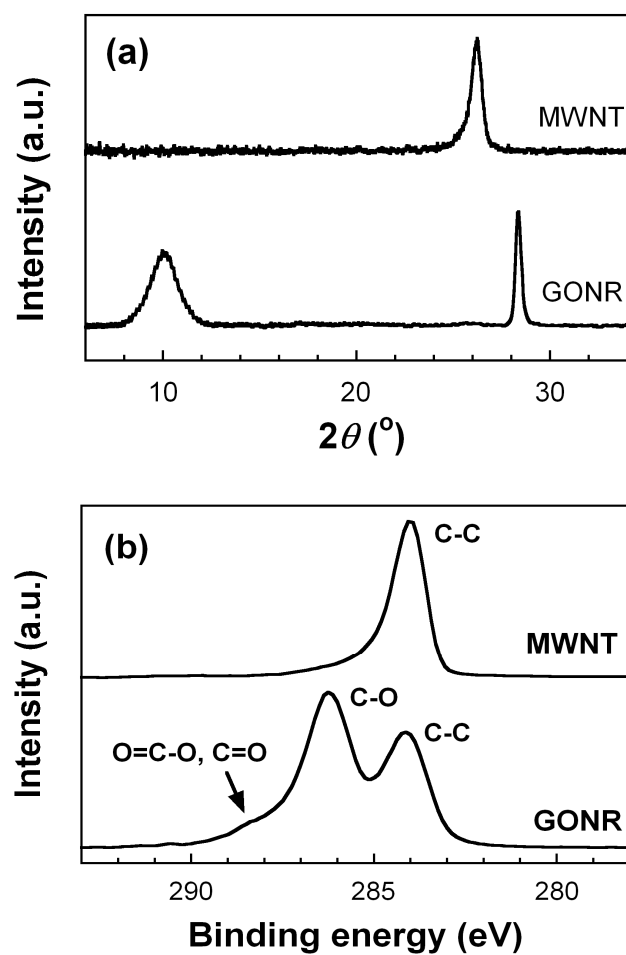

**Figure S1.** (a) XRD patterns and (b) XPS C1s spectra of the starting MWNTs and the prepared GONRs.

**Figure S2** shows the Raman spectra and the mapping images of the spectra at  $1580\text{ cm}^{-1}$  (G-band) for the single MWNT and the monolayer GONR. The Raman spectrum of the MWNT shows a high-intensity G-band and 2D-band ( $2700\text{ cm}^{-1}$ ). On the other hand, the spectrum of the single layer GONR shows a G-band and D-band ( $1360\text{ cm}^{-1}$ ). The latter is due to the residual edge and the disorder in the GONR. In addition, the 2D-band peak is broader than those observed in the graphene prepared by the CVD process.<sup>S1</sup>

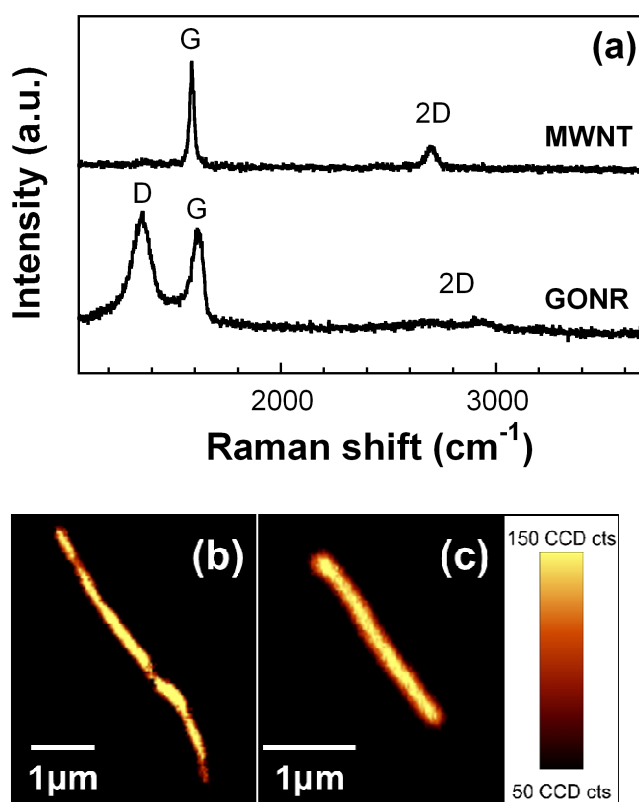

**Figure S2** (a) Raman spectra of the starting MWNT and the prepared GONR. Mapping images of G-band for (b) the starting MWNT and (c) the prepared GONR. The samples are the same as those in Figure 1.

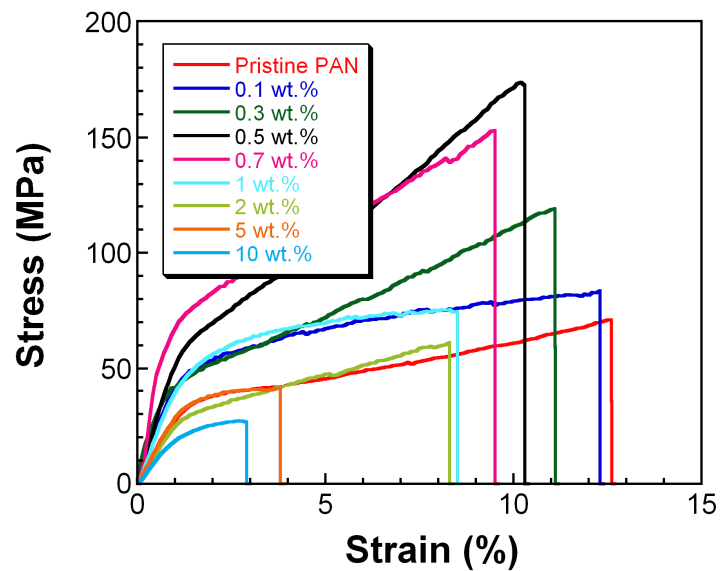

**Figure S3.** Typical specific stress-strain curves for the as-spun GONR/PAN composite nanofiber yarns. The weight fractions of the GONR are 0, 0.1, 0.3, 0.5, 0.7, 1, 2, 5 and 10 wt%. These curves are as-recorded, and the gauge length was 20 mm for all the samples.

**Figure S4** shows that FT-IR spectra of the as-spun PAN, stabilized PAN, and stabilized GONR/PAN composite nanofiber yarns (GONR/PAN = 0.5/99.5 wt/wt). After the stabilization, the peaks at  $1595\text{ cm}^{-1}$  ( $\text{C}=\text{N}$  band) and  $1375\text{ cm}^{-1}$  ( $=\text{CH}-$  band) were clearly observed. On the other hand, the intensity of the peak at  $2240\text{ cm}^{-1}$  ( $\text{C}\equiv\text{N}$  band) was lower. These results demonstrated that the stabilization easily occurred and aromatic structures (*i.e.*, “ladder-structure”) were formed in the PAN and GONR/PAN nanofibers.

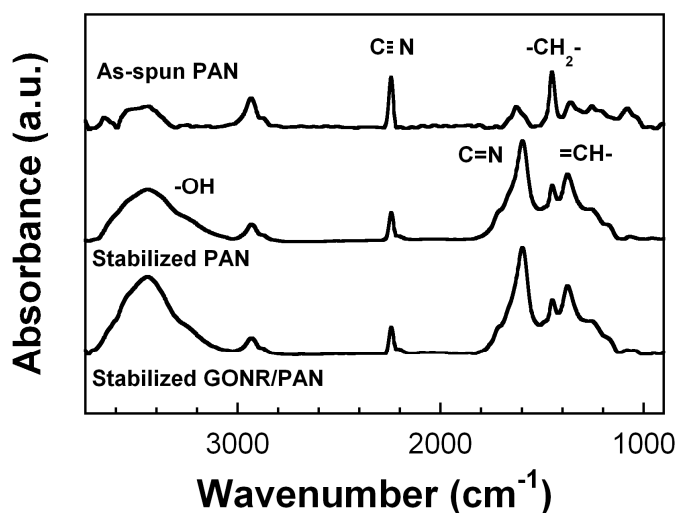

**Figure S4.** FT-IR spectra of the as-spun PAN, stabilized PAN and stabilized GONR/PAN composite nanofiber yarns (GONR weight fraction is 0.5wt%).

**Figure S5** shows the thermogravimetric curves for the stabilized PAN and GONR/PAN composite nanofiber yarns. For the stabilized PAN nanofiber yarn, the temperature of the 10 % weight loss was 310 °C, and the remaining weight at 800 °C was around 40 % of the initial weight. For the stabilized GONR/PAN composite yarn, on the other hand, the temperature of the 10% weight loss was around 310 °C, and the remaining weight at 800 °C increased with an increase in the GONR fraction. This serves as a confirmation of the preservation of the GONRs in the stabilized fiber.

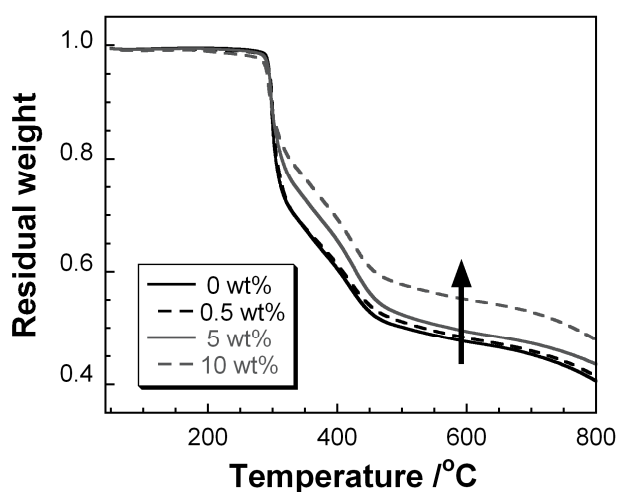

**Figure S5.** Thermogravimetric curves for the stabilized GONR/PAN composite fiber yarns. The weight fractions of the GONR are 0, 0.5, 5 and 10 wt%.

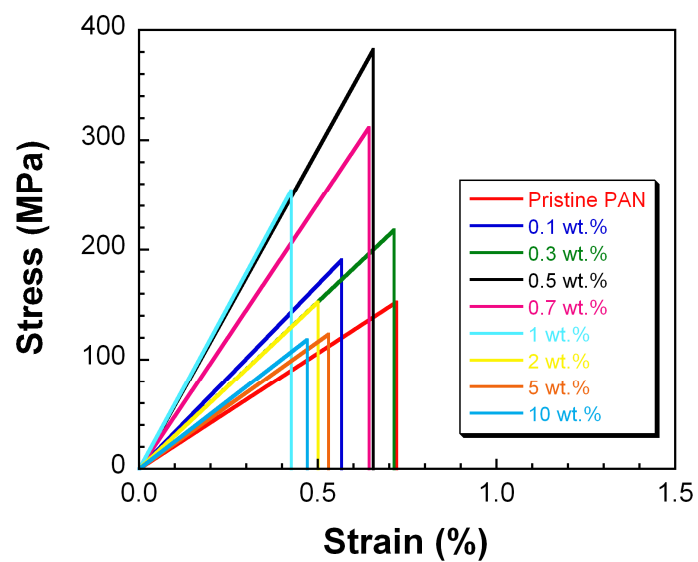

**Figure S6.** Typical specific stress-strain curves for the GNR/carbon composite nanofiber yarns. The weight fractions of the GONR are 0, 0.1, 0.5, 0.7, 1, 2, 5, and 10 wt%. These curves are as-recorded, and the gauge length was 20 mm for all the samples.

To measure the electrical conductivity of the monolayer GNR, the electronic devices with a monolayer GNR were fabricated on a Si substrate and then annealed in a nitrogen atmosphere at 800 °C for 5 hours. The schematic and SEM images are shown in Figure S7a. The channel length was 1  $\mu\text{m}$ . The electric field effect in the GNR at room temperature was tested using a probe station under atmospheric pressure. The  $I$ - $V$  data were collected by an analyzer. Figure S7b shows the  $I_{\text{sd}}-V_{\text{sd}}$  curves recorded at different gate voltages for the same electronic device. The conductivity of the annealed GNR (GNR) at a zero gate bias was 53.6  $\text{Scm}^{-1}$ , which compares to the reported conductivity for the monolayer GNRs ( $\sim 35 \text{ S/cm}$ ).<sup>S2</sup>

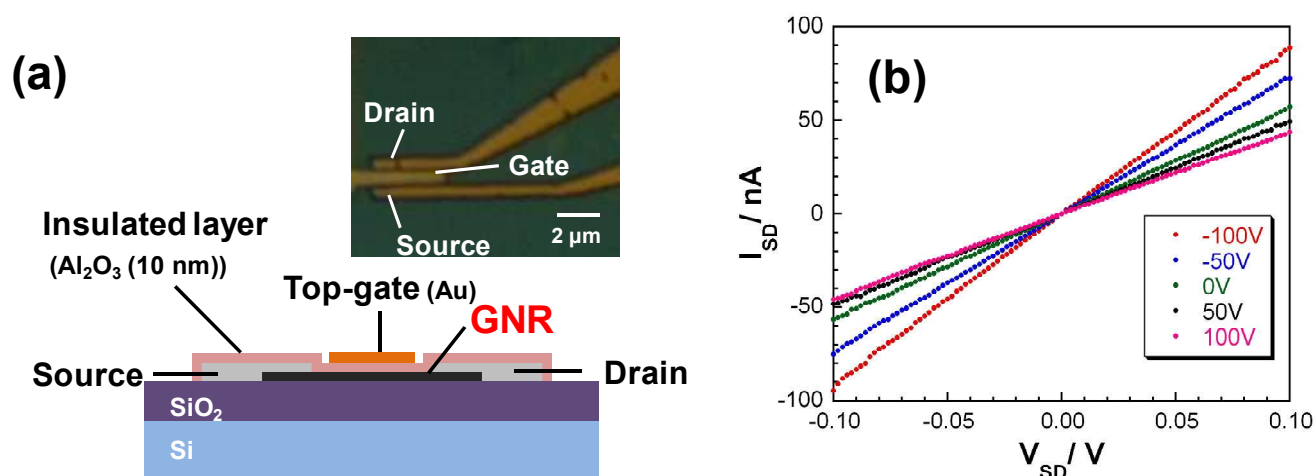

**Figure S7.** (a) A cross-sectional schematic of the GNR-device (inset) An SEM image of the GNR-device and (b)  $I$ - $V$  curves of GNR device at the different gate voltages.



## REFERENCES

(S1) Ismach, A.; Druzgalski, C.; Penwell, S.; Schwartzberg, A.; Zheng M.; Javey, A.; Bokor, J.; Zhang, Y. *Nano Lett.*, **2010**, *10*, 1542-1548.

(S2) Sinitskii, A., Fursina, A. A., Kosynkin D. V., Higginbotham, A. L., Natelson, D., Tour, J. M. *Appl. Phys. Lett.* **2009**, *95*, 253108.
